# Supplementary material for: Analytic characterization of random errors in spectral dual-polarized cloud radar observations
Source: Copernicus journal article supplement (doi:10.5194/amt-2021-225), 2021-08-18
Supplement: Supplementary file [file amt-2021-225-AC2-supplement.pdf]

We would like to thank Prof. Moisseev for the valuable comments. The input definitely helped us to improve the manuscript. Below each of the comments is addressed. The comments are shown in blue color, while our responses are in black.

**Reviewer comment 1:** The main problem of this manuscript, it is not easy to read.

**Response:** Indeed, the manuscript has a lot of information and mathematical expressions, which might be difficult to follow for a reader not familiar with the topic. We, however, did our best to make the manuscript as open as possible. We explain all general steps in the main body of the manuscript leaving the details of the mathematical derivations in the appendix. In addition, we published the data and all scripts required to completely reproduce the results. The scripts can be also applied to different data in order to ease the application of the derived formula to original studies. We believe that an interested reader should be able to prove the results we got. For a less experienced user, the ready-use-scripts are available in the supplement.

**Reviewer comment 2:** In equation (9) you use  $B_{hh}$ ,  $Z_{dr}$ ,  $\rho_{hv}$  and  $\Phi_{dp}$ . Why do you use  $B_{hh}$  and not  $Z_{hh}$ , which would be more commonly used? Of course,  $B_{hh}$  is not  $Z_{hh}$ , it is a spectral  $Z_{hh}$ . But the same applies to  $Z_{dr}$  and the rest of variables. It would be good if you would try to use more widely used notations.

**Response:** Please note, that  $B_{hh}$  is a variable proportional to the power of a spectral line in the horizontal channel. Depending on the exact radar system it can be different quantities. It can be calibrated in reflectivity units (e.g. in RPG cloud radars), but it can be also calibrated in Watts, or even in arbitrary units (e.g. METEK cloud radars). There is no difference in using any of these quantities as  $B_{hh}$ . This is the reason why we do not want to restrict formulas to the spectral reflectivity only. The notation  $B_{hh}$ ,  $B_{vv}$ , and  $B_{hv}$  we used to be consistent with the previous study on cloud radar spectral polarimetry (Myagkov et al 2016). We added the following sentence to the manuscript: "Note, that in general  $B_{hh}$ ,  $B_{vv}$ , and real and imaginary parts of  $\dot{B}_{hv}$  can be calibrated in any quantity that is proportional to the power (Watts) received by the radar; e.g. classical radar reflectivity ( $\text{mm}^6 \sim \text{m}^{-3}$ ) or even arbitrary units \citep{Myagkov2015a}."

**Reviewer comment 3:** On line 89, page 3. You state "For each transmitted pulse (the term pulse is used throughout the study, although for radars with frequency modulated continuous wave signals a chirp would have been implied)". Then in Section 5 you return to using chirp and introduce chirp sequence. It took me some effort to adjust to that transition. I would suggest that you either use pulses or chirps.

**Response:** Thanks for pointing this out. We agree that this is misleading. We think that using the term 'pulse' fits better to the introduction section because pulsed radars are more widely spread in the meteorological community. On the other hand, in the validation section we use

an FMCW radar which uses chirps. We decided to add the following to the manuscript: "Since pulsed radars are currently more common in the meteorological community, we use the term "pulse" to refer to a type of the transmitted radar signal in Secs. 2–4. For radars with frequency modulated continuous wave (FMCW) signals, however, the term "chirp" should be used. Later, in the Sec. 5 we use measurements from a FMCW radar and therefore the term "chirp" is used there.

**Reviewer comment 4:** The other concern is whether results of this study will ever be used. Because the formulations are rather complex, there is a good chance that they will never be adopted. Is there an approximation that can be used and that would work for most applications? If yes, could you make a recommendation.

**Response:** Please note, that the aim of the manuscript is two-fold. (1) The given error model is a very important component of our own retrieval algorithms currently being developed. In order to make it possible to refer to the error model instead of describing this complex math in every following manuscript we would like to publish the error model first. (2) We agree that there are simpler models (with approximations and assumptions) available and there are many studies using them (examples are given in the introduction section). We do not see a point in making the long path through the complex math to get the exact solution and afterwards to reduce its accuracy by assumptions and approximations. If an available simplified error model fits reader needs it can be used. We just want to make the exact solution available for the community as well. As mentioned earlier, we also provide ready-to-use matlab scripts in the supplement. The scripts allow a reader to directly use our results without going through the math and without implementing it from a scratch.

**Reviewer comment 5:** Of course, the other option could be a follow up study, demonstrating practical applications.

**Response:** We are currently working on a few variational retrieval techniques using the given error model. It is our plan to publish them in near future. Giving an application example in the current manuscript would make it even larger and even more complex. We added the following to the Summary section: "In order to demonstrate a practical application of the developed characterization of the measurements errors, a few retrieval techniques are being currently developed. The first one is an improvement of the ice-share retrieval described in \cite{Myagkov2015a}. Another one is an adoption of the drop-size-distribution from \cite{Tridon2015} for dual-polarimetric cloud radar observations."

**Reviewer comment 6:** Abstract: "This study presents the first-ever complete characterization of random errors in dual-polarimetric spectral observations of meteorological targets by cloud radars." While this statement is true, at least to my

knowledge, it seems to me that the underlying assumptions are not very, if at all, different from what are used to describe normal dualpolarization observations. Could you please elaborate what are the main differences? I would argue that the derived expressions presented in this study are representing a subset of conditions for which expressions in (Doviak and Zrnic) or (Chandrasekar and Bringi) are derived. One big simplification, which I believe is valid for spectra observations at least to some extent, used in this study is that averaging is performed using independent spectra, i.e.  $N_s$  represents number of independent averages. That means that one does not need to consider the correlation function, which is a must for time-domain observations. I think a more complete discussion on this should be included in the article. You are giving a short discussion on line 105. I would suggest that you compare and contrast the assumptions used in this study and more classical studies.

**Response:** Please note, that the discussion in Lines 97—108 of the original version of the manuscript considers the correlation between neighboring range and spectral bins. This correlation is not related to the correlation of samples in time domain. We give some general considerations about possible sources and implications of the correlation in range and spectral domain but, as stated in the manuscript, detailed analysis of these effects is out of the scope of the manuscript. We think that Prof. Moisseev was referring more to the correlation in the time domain.

Prof. Moisseev is totally right, we do not develop a new approach for the error characterization. In fact, we follow the very same approach from classical works of Doviak, Bringi, Zrnic, and Chandrasekar. And we cite their works a lot throughout the manuscript. The reviewer is absolutely right that in the case of spectra we make a simplification that time samples of a spectral line are not correlated. This is because the coherency period of the scattering is smaller than time required to collect pulses for a single FFT. It can be proved using Eq. 5.2 in Doviak et al 1979 that states that samples are only significantly correlated if:

$\frac{\lambda}{2T} \gg \sigma$ , where  $\lambda$  is the wavelength,  $T$  is sample period, and  $\sigma$  is spectral width. Assuming the wavelength of 3.2 mm,  $T = 1/10000$  [Hz] \* 256 = 0.0256 s (10000 kHz is a typical pulse repetition frequency, 256 is a typical number of pulses for FFT) the spectral width must be much smaller (at least an order of magnitude) than 0.0625 m/s in order to have some significant coherency. Since in the atmosphere there is almost always a turbulence stronger than few cm/s, it can be safely assumed that there is no coherency between samples of a spectral line.

Using this simplification, we derived an analytical solution for the error characterization applicable to cloud radar spectral polarimetry and this is exactly the novelty of our work. We agree that it is may not be clear enough from the manuscript. To make it clearer we implement the following modifications

- (1) explicitly saying that we use exactly the same assumptions as in classical works in the beginning of section 2: "This section introduces relations between a raw cloud radar signal, complex amplitudes, and spectral polarimetric variables for observations of meteorological targets. These relations are based on the same set of assumptions introduced in classical works of Doviak et al. (1979) and Bringi and Chandrasekar (2001) for precipitation radars."
- (2) Adding the explanation why we can assume that samples of a spectral line are not coherent. "Unlike precipitation radars which perform rapid azimuth scans, cloud radars are typically pointed to a certain direction or make slow scans to get non-broadened Doppler spectra. \cite{Doviak1979} showed (Eq.~5.2 in there) that the coherency between the adjacent samples depends on the wavelength and the sample repetition period. Cloud radars typically have the pulse repetition frequency in the order of  $10^3$  kHz and  $N_{\text{fft}}$  in the range from 128 to 1024. This results in getting a single spectrum every 0.01--0.1 s. For such sampling properties of cloud radars any significant coherency between adjacent samples of a spectral line requires the spectral broadening not exceeding at most a few  $\text{cm}^{-1}$ . The turbulent spectral broadening, however, exceeds few  $\text{cm}^{-1}$  even in stratiform non-precipitating clouds \cite{Borque2016}. Therefore, consecutive samples of complex amplitudes for a spectral line can be considered to be independent."
- (3) adding the following to the section 3: "The estimators Eqs. 15–18 are the same as given in Bringi and Chandrasekar (2001, Chapter 6.4.5). The only difference is that within this work the variables are calculated using complex amplitudes for a spectral line instead of using I/Q components as is done by precipitation radars"

**Reviewer comment 7:** "One of the main conclusions of the study is that the convenient representation of spectral polarimetric measurements including differential reflectivity ZDR, correlation coefficient  $\rho_{HV}$ , and differential phase  $\Phi_{DP}$  is not suited for the proper characterization of the error covariance matrix." I believe you need to explain this point more explicitly. In the summary the discussion is rather short: "It is illustrated that elements of  $\Sigma_c$  have considerable differences from those estimated from the measurements. The differences are related to the first-order Taylor approximation which does not take into account nonlinearities. In contrast,  $\Sigma_b$  agrees well with the observations. The correlation between calculated elements of  $\Sigma_b$  with those estimated from the observations exceeds 0.965."

**Response:** We added the following to the summary section: "First, we found differences in variances of  $Z_{DR}$ ,  $\rho_{HV}$ ,  $\Phi_{DP}$  of up to factor of 10, 5, and 100, respectively. Second, the calculated variance of  $\Phi_{DP}$  shows unrealistically high values by far

exceeding the range of possible values. Third, most of the off-diagonal terms of  $\Sigma_c$  are not correlated with corresponding values estimated from observations."

**Reviewer comment 8:** I did not understand if the problem is due to the first-order Taylor approximation used or something else. In many applications an approximation would perfectly well. What would you recommend using to get an estimate of the uncertainty? The relations you are deriving may be too complex for most applications.

**Response:** The statistics of the vector  $b$  fits well to the observations. On the other hand, the statistics of the vector  $c$  derived by the first-order Taylor from the vector  $b$  does not fit to observations. This means that the first order Taylor approximation is the reason. And it is reasonable explanation, because the approximation assumes linear relations between elements of the vector  $b$  and the elements of the vector  $c$ . But of course, it is clear that these relations are by far not linear. When the signal to noise ratio is high (in precipitation radar community this is often checked by having  $\rho_{hv}$  close to 1), then of course variability is quite low and the Taylor approximation gives reasonable results. At low signal-to-noise ratio, however, the variability is high and the non-linearity introduces much larger errors into the variance estimates. The extreme effect can be seen in the variance of PHIDP (see figure 4d), where the variance estimate goes far beyond values PHIDP can take. We added the following to the summary section: "We relate the differences to the first-order Taylor approximation. The Taylor approximation assumes linear relations between elements of the vector  $b$  and the elements of the vector  $c$ , while the relations include highly non-linear functions."

In the summary sector we have given the recommendation to use the statistics of the vector  $b$  instead of  $c$ . As explained above, it is reasonable to use the simplified approximations when they give acceptable results. For cases when this is no longer possible (e.g. low SNR) our manuscript offers exact solutions with ready-to-use matlab functions. We added "When the signal to noise ratio is high ( $> 35$  dB), however, the variances are quite low and the Taylor approximation may give reasonable results."

**Reviewer comment 9:** "The joint PDF for polarimetric observations obtained for a single pulse can be found in Middleton (1996, chapter 9.2). Single-pulse measurements, however, are rarely used in the radar meteorology because of the low sensitivity and higher requirement for storage space. The observed radar spectra, almost always, result from the averaging of a number of return pulses. Unfortunately, a solution for the case of averaging over a number of pulses is not yet available in literature." I am not sure if the authors are completely correct. Please see the reference below, where analytical forms of pdf of estimates dual-pol variables are derived. While the derived pdfs are given for SAR observations, the underlying assumptions are the same. Jong-Sen Lee, K. W. Hoppel, S. A. Mango and A. R. Miller, "Intensity and phase statistics of multilook polarimetric and

interferometric SAR imagery," in IEEE Transactions on Geoscience and Remote Sensing, vol. 32, no. 5, pp. 1017-1028, Sept. 1994, doi: 10.1109/36.312890.

**Response:** we are especially grateful for this comment! We were not aware of this publication. We added the following text to the introduction section: "\cite{Lee1994} showed a derivation of a joint probability density function of polarimetric variables for the case of averaging. The authors used a number of assumptions applicable for Earth's surface observations using synthetic-aperture radars. It turns out that the same assumptions are applicable to spectral polarimetric observations of meteorological targets. This allows for using a similar approach in analytic characterization of errors of spectral polarimetric observations."

**Reviewer comment 10:** Line 165: Please explain what  $N_s$  actually means. I expect that you imply that  $N_s$  stands for number of independent spectra used to compute an average. This means that spectra are computed from non overlapping time sequencies. Is this correct?

**Response:** Yes, this is correct. We clarified this in the text.

**Reviewer comment 11:** What is the impact of noise (I suggest that you state explicitly what is the impact of noise on your formulations)?

**Response:** We agree, that this point is not covered in the manuscript. The noise in both polarimetric channels is not known exactly. Typically, it is estimated from spectra using e.g. the Hildebrand-Sekhon algorithm. A subtraction of noise levels from corresponding diagonal terms of the covariance matrix  $\mathbf{B}$  to get an estimate of signal-only power leads to occasions when the noise corrected matrix  $\mathbf{B}$  is no longer positive semidefinite. In this case the correlation coefficient calculated from noise corrected matrix  $\mathbf{B}$  can exceed 1, which is mathematically speaking should not be possible. In order to avoid this problem, we use the signals as they are measured by the radar i.e. signal + noise. In other words, our used polarimetric variables are not "intrinsic" but affected by noise. Only in this case we can properly describe the statistics. This we explicitly discussed in the manuscript now (end of the section 2.2).

**Reviewer comment 12:** Section 5. "Measurements were made during a rain event on 21 June 2021 at 7:44 UTC. I/Q measurements provide high data rate of about 900 MB min<sup>-1</sup>. Therefore, about 3 min of I/Q measurements were collected for the analysis. Since different chirp types 275 have different properties, in the following only I/Q data collected with the first chirp type are used. Taking into account that the first chirp type has 37 range bins, in total  $2.2 \times 10^3$  chirp sequences ( $15.9 \times 10^6$  chirps) are available in each polarimetric channel." A number of questions arises. What did you measure, rain, cloud, etc? What was SNR? You need to give a better description of the observations.

**Response:** In general, it does not matter what kind of meteorological target (rain or cloud) we use for the validation. More important is to make sure that the target has properties of the meteorological target and this we check in Sec. 5.2. But we agree that a better description can be provided, however, in the original manuscript it is written that we collected 3 min of I/Q measurements during a rain event. We extended the measurement description as follows: "The radar was pointed to  $45^\circ$  elevation. Since the first chirp sequence covers the lowest part of the atmosphere, the analyzed data correspond to rain. As explained in Sec. [\ref{sec:spec\\_pol}](#), no noise subtraction is required to describe the statistics of the measurements. We therefore, use all available spectral lines, including those containing noise only. 90% of spectral noise power was from  $0.2\text{--}1.3 \times 10^{-3}$  [a.u.]. Signal-to-noise ratio (defined here as a ratio of signal power in a spectral line divided by the mean spectral noise power in the same range bin) specified in linear units was from 0 (no signal) to  $10^6$ . We would like to emphasize, that no filtering based on signal-to-noise ratio was applied."
